# Supplementary material for: Mid-Holocene Northern Hemisphere warming driven by Arctic amplification
Source: PubMed Central journal article supplement — Sci Adv. 2019 Dec 11;5(12):eaax8203. doi: 10.1126/sciadv.aax8203 (PMC6905875; doi:10.1126/sciadv.aax8203), 2019-12-11
Supplement: aax8203_SM.pdf [file aax8203_SM.pdf]

## Supplementary Materials for

### **Mid-Holocene Northern Hemisphere warming driven by Arctic amplification**

Hyo-Seok Park\*, Seong-Joong Kim, Andrew L. Stewart, Seok-Woo Son, Kyong-Hwan Seo

\*Corresponding author. Email: [hspark1@gmail.com](mailto:hspark1@gmail.com)

Published 11 December 2019, *Sci. Adv.* **5**, eaax8203 (2019)  
DOI: [10.1126/sciadv.aax8203](https://doi.org/10.1126/sciadv.aax8203)

#### **This PDF file includes:**

- Fig. S1. Mid-Holocene insolation anomalies.
- Fig. S2. Surface temperature anomalies simulated by climate models.
- Fig. S3. Testing the impact of mid-Holocene tropical cooling using CM2.1.
- Fig. S4. Same as Fig. 2 except for the second and third warmest/coldest model composites.
- Fig. S5. Autumn-winter surface heat fluxes in the Arctic.

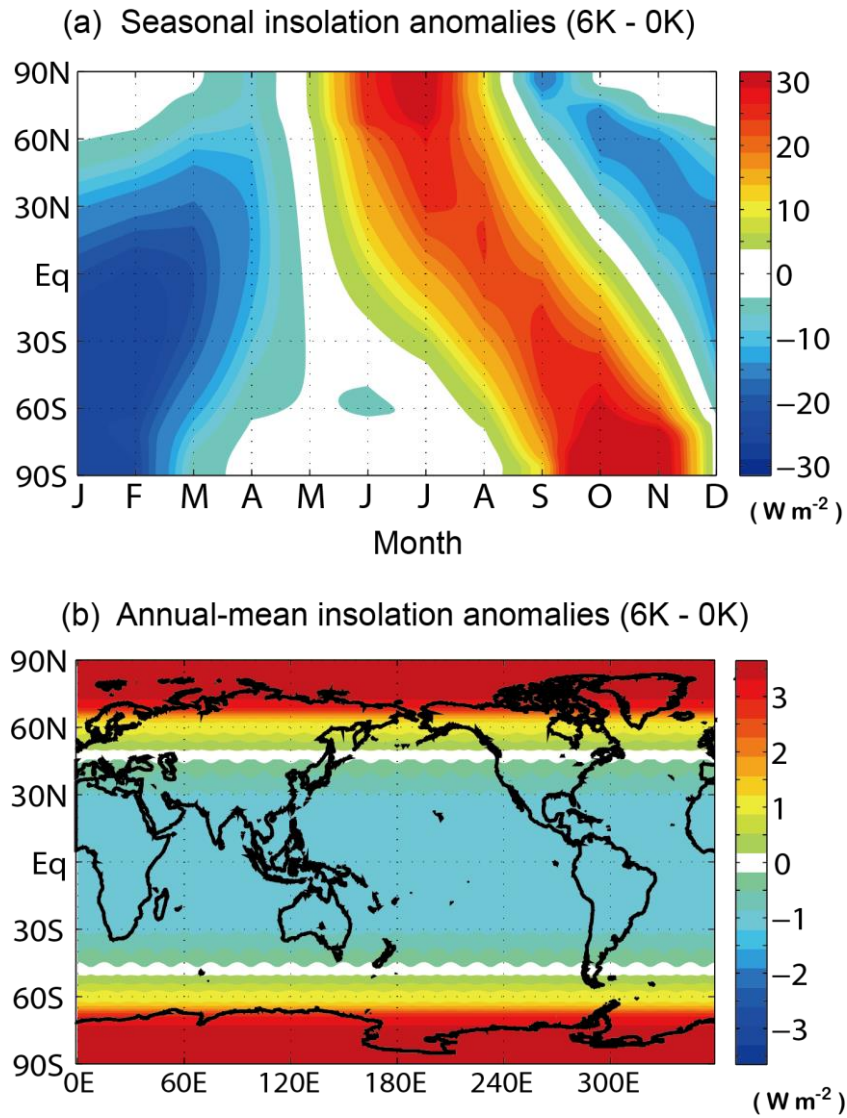

**Fig. S1. Mid-Holocene insolation anomalies.** (a) Seasonal and (b) annual-mean insolation differences ( $\text{W m}^{-2}$ ) at the top of the atmosphere (differences between 6 ka and 0 k).

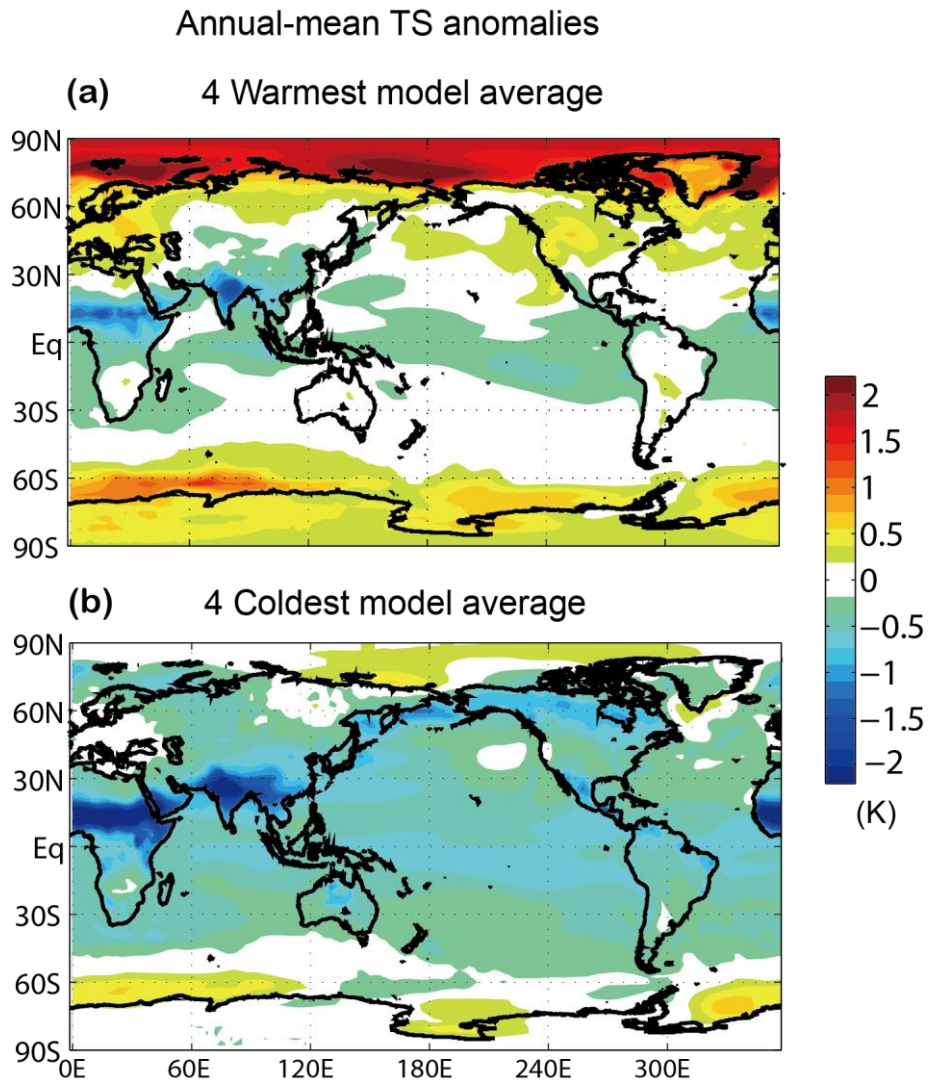

**Fig. S2. Surface temperature anomalies simulated by climate models.** Composite maps of the annual-mean surface temperature anomalies in the mid-Holocene, averaged for (a) the 4 warmest and (b) the 4 coldest models.

Testing the impact of 6K tropical SST cooling on TS using CM2.1

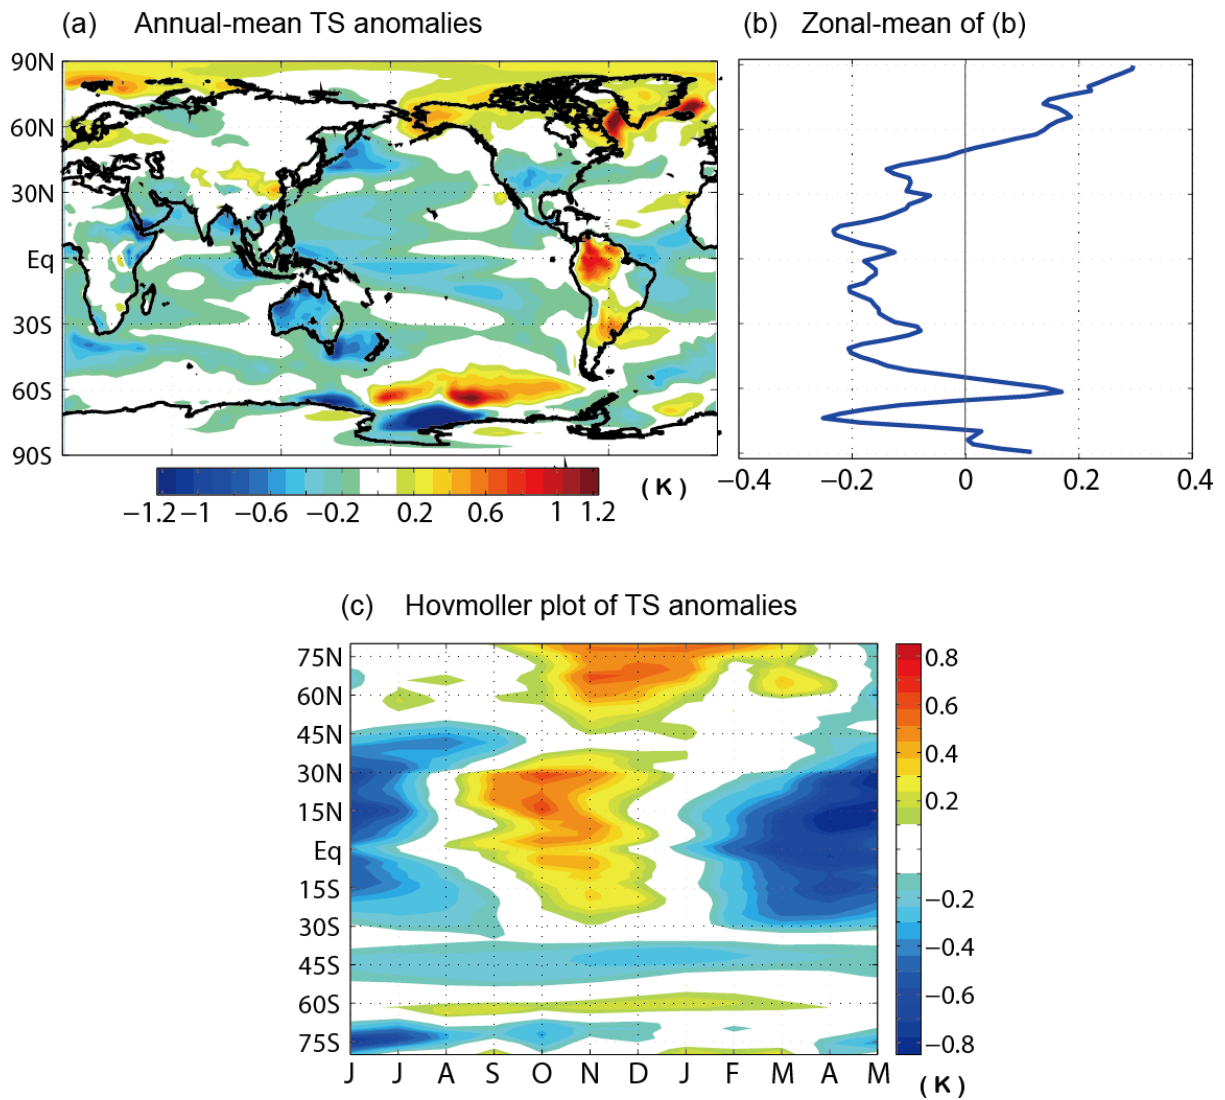

**Fig. S3. Testing the impact of mid-Holocene tropical cooling using CM2.1.** The impact of the mid-Holocene tropical SST cooling on (a) the annual-mean, (b) the zonal-mean of the annual-mean, and (c) zonally-averaged seasonal surface temperatures. In (c), the abscissa is time (months) and the ordinate is latitude.

Hovmoller plot of surface temperature

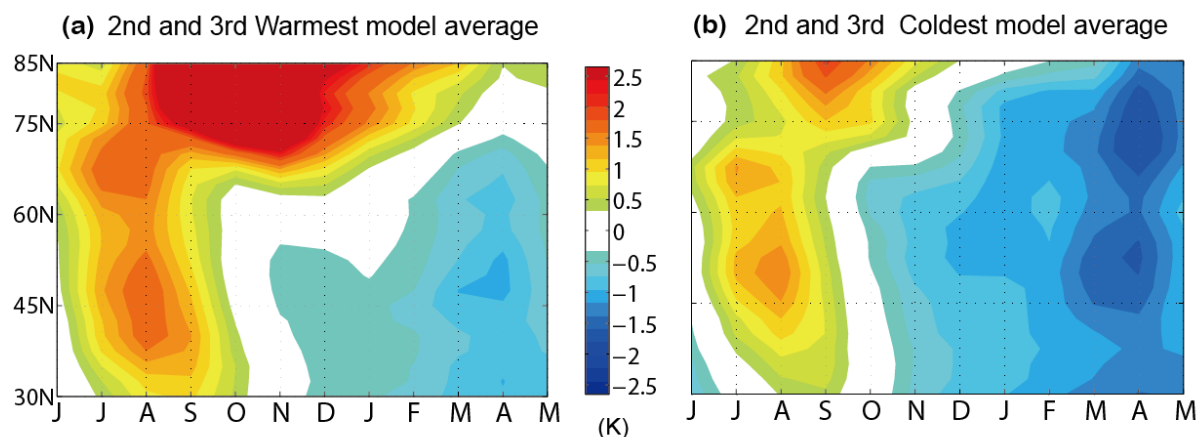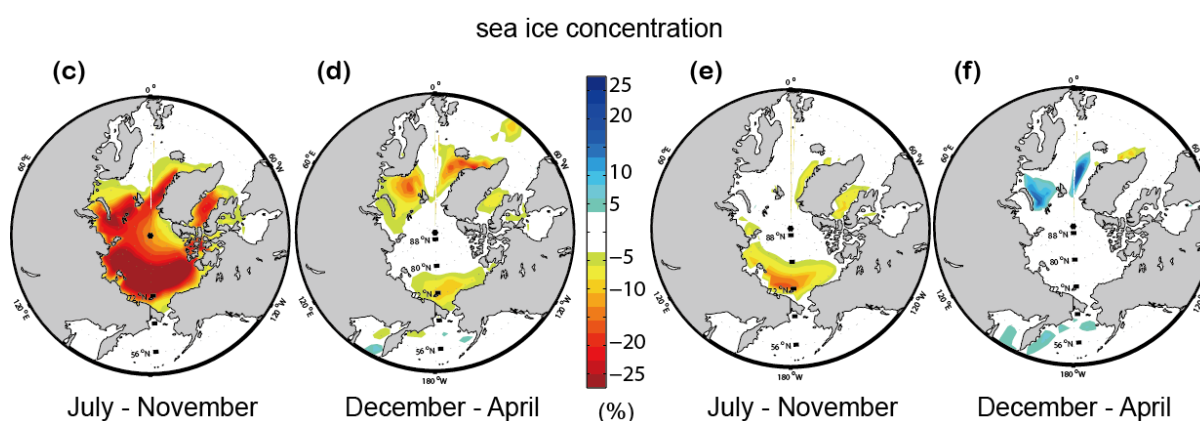

**Fig. S4. Same as Fig. 2 except for the second and third warmest/coldest model composites. (a, b)** Zonally averaged, latitude–time Hovmöller plots of surface temperature anomalies in **(a)** the 2<sup>nd</sup> and 3<sup>rd</sup> warmest models and **(b)** the 2<sup>nd</sup> and 3<sup>rd</sup> coldest models. The abscissa is time (months) and the ordinate is latitude. Arctic sea ice concentration (%) anomalies in **(c, d)** the 4 warmest models and **(e, f)** the 4 coldest models, averaged in **(c, e)** July–November and **(d, f)** December–April.

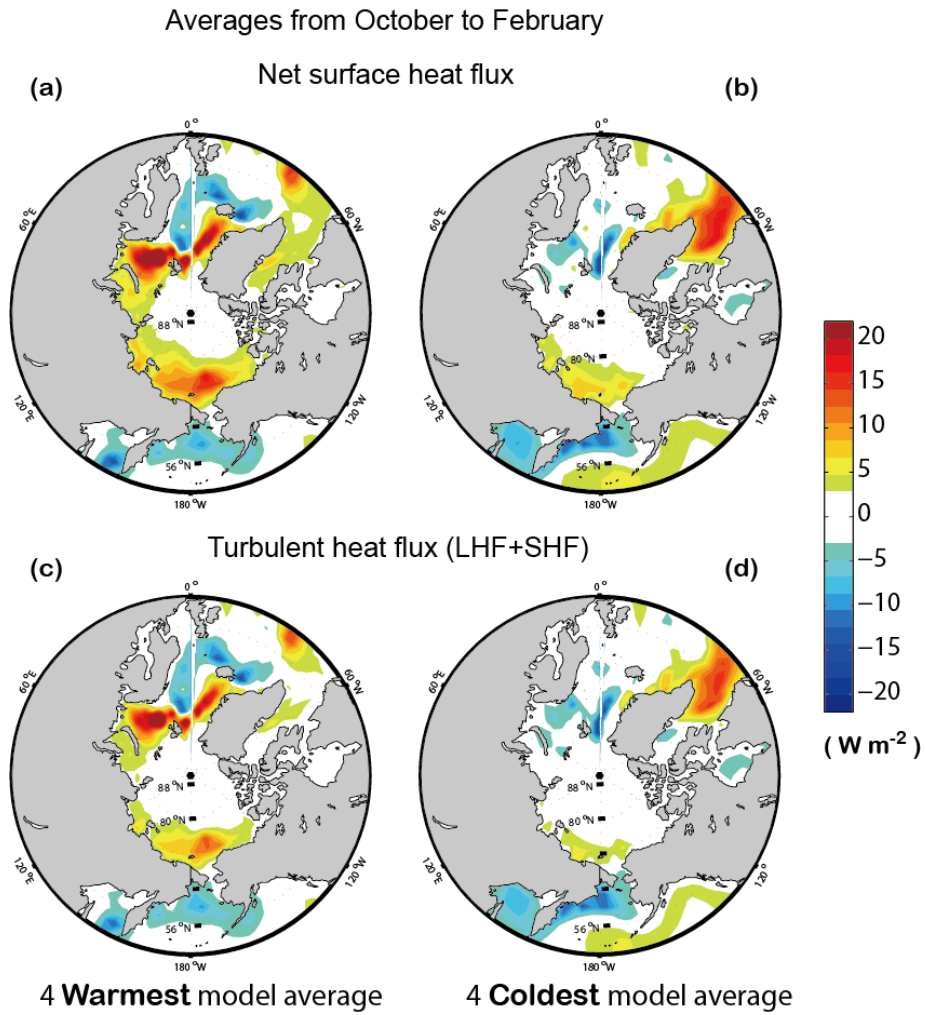

**Fig. S5. Autumn-winter surface heat fluxes in the Arctic.** The autumn-winter (Oct-Nov-Dec-Jan-Feb) (a, b) anomalous net surface heat flux ( $F_{SW}^{\uparrow} - F_{SW}^{\downarrow} + F_{LW}^{\uparrow} - F_{LW}^{\downarrow} + SHF^{\uparrow} + LHF^{\uparrow}$ ; W m<sup>-2</sup>) and (c, d) surface turbulent heat flux ( $SHF^{\uparrow} + LHF^{\uparrow}$ ) averaged in (a, c) the 4 warmest models and (b, d) the 4 coldest models. Warm colors imply anomalously large fluxes from the ocean surface to the overlying atmosphere.
